# Supplementary material
Source: PubMed Central journal article supplement (PMC1567701)
Supplement: pnas_0600291103_2.pdf [file pnas_0600291103_2.pdf]

VTASAPSVFPLIPCCGNVDFEDSVTMGCLVTGYMADPLDIQWNDGSIT'TG'IK'TMGPVLSAADGLYTLSSQ  
10 20 30 40 50 60 70

laev IgX VTASAPSVFPLIPCCDNVDFNDSVTMGCLVTGYMADPLDIQWNDGSIT'TG'IK'TMRPVLSVDVGLYTLSSQ 70  
trop IgX VTASAPSVFPLIPCCGNVDFENSVTMGCLVTGYMADPLEIQWNDGSIT'TG'IK'TMGPVLSAADGLYTLSSQ 70

LTILASEWKNSTYKCKVHHNSTNTKQEKSLKVLVPC IAPHVQLFLQSPCMSDAASDAQHENINATLDDLVC I  
80 90 100 110 120 130 140

laev IgX LTILASEWKNSTYKCKVHHNYTNTKQEKSLKVLVPCMAPHVQLFLQSPCMSDAISRAQHENINATLDDLVC I 140  
trop IgX LTILASEWKNSTYRCKVHHNSTNTKQEKSLKVLVPCIEPHVQIFLQPPCMSDVAPDTKPKQKINATLDDLVC I 140

INNFYHGQIKVKWL VNGKQDVSAEASVPTPIKTEDGTYSASSQLRILKGMWNKGTQYSCVVTHTSSNTTT  
150 160 170 180 190 200 210

laev IgX INNFYHGQIKVKWL VNGKQDVSAEASVPTPSKTEDGTYSASSQLRILKGMWNKGTQYSCIVTHTSSNTTT 210  
trop IgX IKNFYHEQIKLKWLMNGKQDLSAEASVNPPIKTEDGTYSASSQLRILKGMWNKGMQYSCVVTHTSSNTTT 210

IANISQCTEECHDNLQVHPLTPTFFHDLYFSRIAKV'TCLVSSMKT' IENFDIAWEREKAGNLEFV'TEDPVLH  
220 230 240 250 260 270 280

laev IgX IANISQCTEQCHDNLQVYPLTPTFFHDLYFSRNAKV'TCLVSSMKT' IENFDISWEREKAGNLEFV'TEDPVLH 280  
trop IgX IANITKCTEECYDNLQVHPLPPTFFHDLYFSRIAKIT'CLVSSMKT' IENFNIAWEREKEGKLEFV'TEDPVLH 280

DNGTYSVASVLSVCAEDWESGDKF'SCTVRSQDL'PSPVKKT'IFKQNEGTPKAPDVYLLPPSAQELLQQ'EVA  
290 300 310 320 330 340 350

laev IgX DNGTYSVASILSVCAEDWESGDKF'SCTVRSQDL'PSPVKKT'IFKQNEGTPKAPDVYLLPPSAQELIQQ'EMV 350  
trop IgX DNGTYSVVSVLSVCAEDWESREKF'SCTVRSQDL'PSPVKKT'IFKQNEGTPKAPDVYLLPPSPQELIQQ'EVA 350

TLTCFVTGFNPKEIFVQWMOGGASISEDKFVNT'VAMKSDGEQTYFLYSKLAI'PAAKWNQGDVFT'CVVGHE  
360 370 380 390 400 410 420

laev IgX TLTCFVTGFNPKEIFIQWMOGGVSISEDKFINT'VPMKSDGEQTYFYLYSKLAI'PAAKWNQGDVFT'CVVGHE 420  
trop IgX TITCYIKGFYFNPKEIFVQWMOGSASISEDKFVNT'VAMKNDDEQTYFLYSKLTI'PAAHWNQGNFTYTCIVGHE 420

ALPLYITQOSIDKSSGKSSLVNV'TLVLSDAASTCY  
430 440 450

laev IgX ALPLYITQOSIDKSSGKSSLVNVNLVMS 448  
trop IgX ALPLYITQOSIDKSSGKPSHVNV'TLVLSDAASTCY 455
