# Supplementary material
Source: PubMed Central journal article supplement (PMC1567701)
Supplement: pnas_0600291103_3.pdf [file pnas_0600291103_3.pdf]

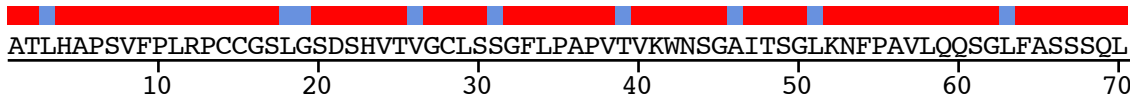

ATLHAPSVFPLRPCCGSSSSSDSHVTVIGCLSTGFLPAPVDVKWNSGSI'TSGLKNFPAVLQOQSGLFASSSQL 70  
 ATQHAPSVFPLRPCCGSLGSDSHVTVGCLSSGFLPAPVTVKWN SGAIT'SGIKNFPAVLQOQSGSFASSSQL 70

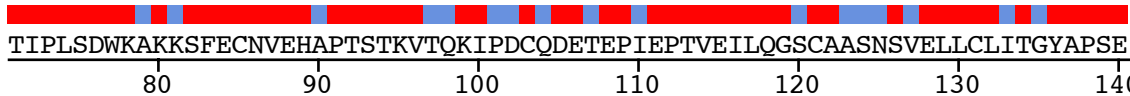

TIPLSDWKAKKSFECNVEHKPTSTKV'TQKI'-ECQDEPEPIEPTVEILQGPCASSKSVELLCLITGYAPSE 139  
 TIPLSDWKDK-SFECNVEHAPTSTKVNKKIPDCKDETEPSEPTVEILQGS CAAPNSIELLCLMTEYAPSE 139

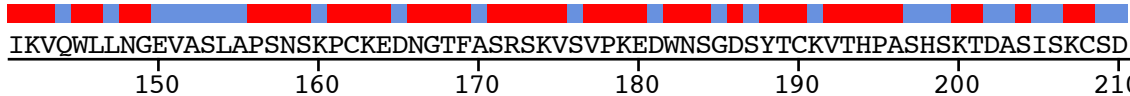

IKVHLLNGQV'TNISPSNSKPCKEENGTFSSRSKVSVPKEHWNSEDSYTC'KV'THPASHTKTEASTKKCDE 209  
 IKVQWLRNGEDASLAPSN SPPCKEDNGTFASRSKVFVPKEDWNSGDTYTCRV'THPATRSKTDVSIKCS D 209

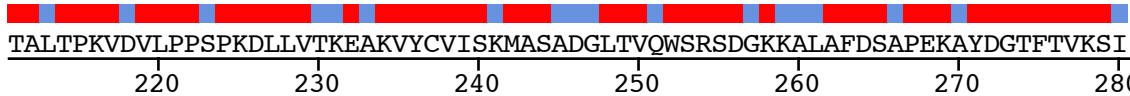

TAITPKVDVLP'PPSPKDLLV'TKEAKVYCVISRMAS'TDDLTVQWSRSDGK KALAFDSAPEKAYDGTFTVKS T 279  
 TALTPKVEVLP'PTPKDLLVNREP'KVYCVISKMASAEGLTVKWSRSDK KRVI AF'DSPPEKEYDGTFTVKS I 279

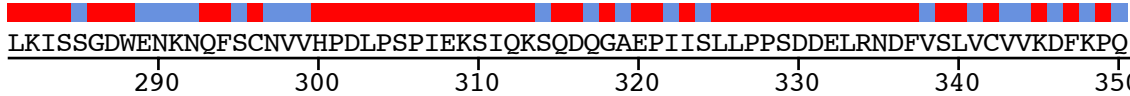

LKISPGDWENKQ'FNCKV'VHPDL'PSP'IEKSIQKSQD'PGTEPT'ITLLPPS'DDEL'RNDF'ISL'ICMLKNFR'PQ 349  
 LKISSGDWQ'PRNQ'FSCNI'HPDL'PSP'IEKSIQK'DQDQGAEP'II'SLLPPS'DDEL'RNDFVSLV'CVVKDF'KPK 349

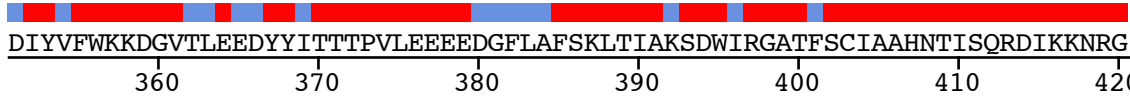

DIYVFWKKDGV'TLEEDYYM'T'TTPVLEEEEEEGF'ISF'SKLT'IA'RS'DW'RMGAT'YSCIAAHNT'ISQ'RD'IKKNRG 419  
 EIYIFWKKDGVPIEKEYYIT'TTPVLEEEEEEDTYLAF'SKLT'IAKSDWIRGAT'FSCIAAHNT'ISQ'RD'IKKNRG 419

■  
 K

laev IgY K 420  
 trop IgY K 420
