# Supplementary material
Source: PubMed Central journal article supplement (PMC1567701)
Supplement: pnas_0600291103_4.pdf [file pnas_0600291103_4.pdf]

|                    |                                                        |                  |         |
|--------------------|--------------------------------------------------------|------------------|---------|
| Catfish DTM        | -----EFTEETIYFDENTSETSTLDQAEETWNMACAFIILFVISLLYGCSVTLV | KVKIA            | (33.3%) |
| Cod DTM            | ----PEILEESVLFDENK-QVQVQDMGEDNWMMTITFLLFFVSLFYGILVTVI  | KTK              | (21.2%) |
| Salmon DTM         | ----VLLGVEGVFFDENRSDPILADTAEENWNMACIFLVFLISLLYSITVTLV  | KTK              | (26.4%) |
| <b>Xenopus DTM</b> | DTTQPTDTPFIY-QDEGGEELSDTEDTSSVWTTSTTFITLFLITIVYSTFVTFI | KVK              |         |
| Cow DTM            | --GLATWPPWS--QDESSDDGTDVEDASPLW---LTFLALFLVTVVYGGFVTFI | KVK              | (50.0%) |
| Human DTM          | YLAMTPLIPQS--KDENSDDYTTFDDVGSLWTTLSTFVALFILTLLYSGIVTFI | KVK              | (38.2%) |
| Mouse DTM          | ----VNTIQHSCIMDEQSDSYMDLEEENGLWPTMCTFVALFLLTLLYSGFVTFI | KVK              | (41.5%) |
| Pig DTM            | --GLATLTPGS--QDEGSDDYVDLEDAGRLW---LTFTVLFLVTLLYSGFVTFL | KVK              | (46.0%) |
| Rat DTM            | --GMVDTIPNSCIRDEQTDSYVDLEEENGLWPTLCTFVALFLLTLLYSGFVTFI | KVK              | (40.0%) |
| Sheep DTM          | --GLATWPPWS--QDESSDDSADAEDASPLW---LTFLALFLATVVYSGFVTFI | KVK              | (52.0%) |
|                    | Transmembrane domain                                   | cytoplasmic tail |         |
