# Supplementary material
Source: PubMed Central journal article supplement (PMC1567701)
Supplement: pnas_0600291103_5.pdf [file pnas_0600291103_5.pdf]

| JH       |     |     |     |     |     | CH1 exon |     |     |     |     |     |     |     |     |     |     |     |     |      |  |  |  |  |  |
|----------|-----|-----|-----|-----|-----|----------|-----|-----|-----|-----|-----|-----|-----|-----|-----|-----|-----|-----|------|--|--|--|--|--|
| ACC      | ATG | GTC | ACC | GTC | ACT | TCA      | GAT | ACA | GGT | ACA | TCT | GCT | ATT | TTC | CCC | CTG | GTT | CCC | 57   |  |  |  |  |  |
| T        | M   | V   | T   | V   | T   | S        | D   | T   | G   | T   | S   | A   | I   | F   | P   | L   | V   | P   | 19   |  |  |  |  |  |
| TGC      | TGT | TCA | CTG | GCC | CAG | AGT      | ATG | CAA | GAA | AAT | ATC | CTA | ATT | GGC | TGC | ATT | ATA | ATA | 114  |  |  |  |  |  |
| C        | C   | S   | L   | A   | Q   | S        | M   | Q   | E   | N   | I   | L   | I   | G   | C   | I   | I   | I   | 38   |  |  |  |  |  |
| GGT      | TCA | GTA | AAG | CCA | GAG | ACA      | ATT | GAG | TGG | ACA | ACA | AAA | GAT | AAA | AGT | CAA | GTT | AAT | 171  |  |  |  |  |  |
| G        | S   | V   | K   | P   | E   | T        | I   | E   | W   | T   | T   | K   | D   | K   | S   | Q   | V   | N   | 57   |  |  |  |  |  |
| GAA      | AAA | AGA | TAT | GAT | GCT | GCT      | CAA | ATC | AGC | ATT | CTG | GCC | ATT | CCA | TCT | CAG | GAT | TGG | 228  |  |  |  |  |  |
| E        | K   | R   | Y   | D   | A   | A        | Q   | I   | S   | I   | L   | A   | I   | P   | S   | Q   | D   | W   | 76   |  |  |  |  |  |
| AAC      | AAT | AAG | CAT | TTT | ACC | TGC      | TCT | ATC | AAG | GAA | GAT | AAT | ACA | AAT | AAA | AAG | TTC | GAC | 285  |  |  |  |  |  |
| N        | N   | K   | H   | F   | T   | C        | S   | I   | K   | E   | D   | N   | T   | N   | K   | K   | F   | D   | 95   |  |  |  |  |  |
| CH2 exon |     |     |     |     |     | CH1 exon |     |     |     |     |     |     |     |     |     |     |     |     |      |  |  |  |  |  |
| CTA      | CAA | AGA | AGG | TGC | GGA | AAA      | AGC | TAT | TCA | GAT | CCC | ATA | GTT | ACC | TTG | ATA | TCT | 342 |      |  |  |  |  |  |
| L        | Q   | R   | R   | C   | G   | K        | S   | Y   | S   | D   | P   | I   | V   | E   | T   | L   | I   | S   | 114  |  |  |  |  |  |
| TCC      | TGT | GCA | GCT | ATA | GAT | ATA      | GTA | CCT | CTG | ACT | TGT | TTT | GTT | ACC | AAC | TTT | AGG | CCA | 399  |  |  |  |  |  |
| S        | C   | A   | A   | I   | D   | I        | V   | P   | L   | T   | C   | F   | V   | T   | N   | F   | R   | P   | 133  |  |  |  |  |  |
| AAT      | GTA | ACT | AAA | CTG | GTC | TGG      | CTT | AGA | AAT | GGT | GTC | GCT | GAA | AAT | AAT | TAT | GTT | GGA | 456  |  |  |  |  |  |
| N        | V   | T   | K   | L   | V   | W        | L   | R   | N   | G   | V   | A   | E   | N   | N   | Y   | V   | G   | 152  |  |  |  |  |  |
| TTC      | AGC | CCT | GAA | TTA | GAC | AAT      | GCA | CAT | ATT | GTT | ATG | GGA | AAG | AGC | ATT | AAG | AAT | GTG | 513  |  |  |  |  |  |
| F        | S   | P   | E   | L   | D   | N        | A   | H   | I   | V   | M   | G   | K   | S   | I   | K   | N   | V   | 171  |  |  |  |  |  |
| TCA      | AGT | GAA | AGC | TGG | AAT | AAA      | GAG | GAT | ATA | TAT | ACA | TGT | CAG | GTG | ACC | TCC | CAT | GAT | 570  |  |  |  |  |  |
| S        | S   | E   | S   | W   | N   | K        | E   | D   | I   | Y   | T   | C   | Q   | V   | T   | S   | H   | D   | 190  |  |  |  |  |  |
| CH3 exon |     |     |     |     |     | CH1 exon |     |     |     |     |     |     |     |     |     |     |     |     |      |  |  |  |  |  |
| AAA      | TCA | ATC | ATC | AGG | AAC | ATC      | AGC | AGA | TGT | TCA | GCA | TGC | CAG | AGC | ACC | TCT | GGG | GAT | 627  |  |  |  |  |  |
| K        | S   | I   | I   | R   | N   | I        | S   | R   | C   | S   | A   | C   | Q   | S   | T   | S   | G   | D   | 209  |  |  |  |  |  |
| CCT      | GTT | GTA | ATA | CTG | GAT | CAG      | CCA | ACA | AAT | GAA | GAA | TTG | TTT | TCT | AAT | GAA | GCC | AAA | 684  |  |  |  |  |  |
| P        | V   | V   | I   | L   | D   | Q        | P   | T   | N   | E   | E   | L   | F   | S   | N   | E   | G   | K   | 228  |  |  |  |  |  |
| ATT      | ACT | TGC | ACA | GTC | TTT | GGG      | AGT | AAA | TTG | GAT | ATC | AAG | GAA | GTA | TAC | GTA | AAA | AGA | 741  |  |  |  |  |  |
| I        | T   | C   | T   | V   | F   | G        | S   | K   | L   | D   | I   | K   | E   | V   | Y   | V   | K   | R   | 247  |  |  |  |  |  |
| AAC      | GGG | ATT | AAA | GTC | AAC | ACT      | GAA | GAC | AAC | AAA | ACA | CAA | GAT | GAT | AAA | CAT | GTA | AAG | 798  |  |  |  |  |  |
| N        | G   | I   | K   | V   | N   | T        | E   | D   | N   | K   | T   | Q   | D   | D   | K   | H   | V   | K   | 266  |  |  |  |  |  |
| ATC      | ACT | TAC | AAG | ATT | ACA | CTT      | GAA | CAA | TGG | GAA | TCA | ACC | ACA | GAA | TTA | TCA | TGT | GTG | 855  |  |  |  |  |  |
| I        | T   | Y   | K   | I   | T   | L        | E   | Q   | W   | E   | S   | T   | T   | E   | L   | S   | C   | V   | 285  |  |  |  |  |  |
| CH4 exon |     |     |     |     |     | CH1 exon |     |     |     |     |     |     |     |     |     |     |     |     |      |  |  |  |  |  |
| GCT      | ACC | AAG | TAT | TGC | ACT | AGC      | ACA | GAC | ACT | GAA | AAG | ACT | ATA | AAA | ATA | GAA | AAG | AAA | 912  |  |  |  |  |  |
| A        | T   | K   | Y   | C   | T   | S        | T   | D   | T   | E   | K   | T   | I   | K   | I   | E   | K   | K   | 304  |  |  |  |  |  |
| AAG      | ACA | GAG | CCT | AAA | GAC | TTC      | AAA | ATC | CCA | TCC | GTC | TCT | GTG | TCC | AGA | CTT | TAC | CAC | 969  |  |  |  |  |  |
| K        | T   | E   | P   | K   | D   | F        | K   | I   | P   | S   | V   | S   | V   | S   | R   | L   | Y   | H   | 323  |  |  |  |  |  |
| CAT      | GAA | TTT | CAG | GAA | GGG | GAA      | TGG | ATC | ACT | CTG | ATC | TGC | AAA | GTC | ACT | GGA | TTT | TAC | 1026 |  |  |  |  |  |
| H        | E   | F   | Q   | E   | G   | E        | W   | I   | T   | L   | I   | C   | K   | V   | T   | G   | F   | Y   | 342  |  |  |  |  |  |
| CCA      | GAA | GAG | ATT | GGT | ATC | AAG      | TGG | GAA | AAT | AAG | AAT | AAG | GGG | GTC | AGT | GCA | TCT | TCA | 1083 |  |  |  |  |  |
| P        | E   | E   | I   | G   | I   | K        | W   | E   | N   | K   | N   | K   | G   | V   | S   | A   | S   | S   | 361  |  |  |  |  |  |
| TAT      | ACC | AGA | AGT | CCA | GTG | AGT      | TGT | TCT | GAG | AGA | AGC | TGC | TCT | GCC | TTT | AGT | CTC | TTG | 1140 |  |  |  |  |  |
| Y        | T   | R   | S   | P   | V   | S        | C   | S   | E   | R   | S   | C   | S   | A   | F   | S   | L   | L   | 380  |  |  |  |  |  |
| AAA      | TTT | TCC | AAG | AAG | GAG | GAA      | ATA | GGA | GGG | TAC | CAA | TGT | GTT | ATA | CAG | CAC | AAG | AGC | 1197 |  |  |  |  |  |
| K        | F   | S   | K   | K   | E   | E        | I   | G   | G   | Y   | Q   | C   | V   | I   | Q   | H   | K   | S   | 399  |  |  |  |  |  |
| CH5 exon |     |     |     |     |     | CH1 exon |     |     |     |     |     |     |     |     |     |     |     |     |      |  |  |  |  |  |
| TTA      | AAA | CAG | CCC | AAC | CGA | AGG      | ATT | TCC | CAA | AAA | GTA | ACA | GAG | ACC | CAA | AGA | GAA | CCT | 1254 |  |  |  |  |  |
| L        | K   | Q   | P   | N   | R   | R        | I   | S   | Q   | K   | V   | T   | E   | T   | Q   | R   | E   | P   | 418  |  |  |  |  |  |
| TCT      | GTT | CTT | GTT | CTT | CAA | TCT      | TCT | GAT | TCG | GAG | GAG | AAA | AAA | ACT | CTT | GCC | TGT | ATT | 1311 |  |  |  |  |  |
| S        | V   | L   | V   | L   | Q   | S        | S   | D   | S   | E   | E   | K   | K   | T   | L   | A   | C   | I   | 437  |  |  |  |  |  |
| GCG      | GAT | GGA | CAC | TTT | CCC | AAG      | GAC | ATA | AAG | ATT | GAA | TGG | AAA | CTT | CAT | GAT | GGA | AGT | 1368 |  |  |  |  |  |
| A        | D   | G   | H   | F   | P   | K        | D   | I   | K   | I   | E   | W   | K   | L   | H   | D   | G   | S   | 456  |  |  |  |  |  |
| ACG      | CTT | CCT | TCC | TCA | ACT | GAA      | ACA | GAC | TAC | AAG | AAC | AAT | GGG | ACC | TTT | AGA | ACA | ATT | 1425 |  |  |  |  |  |
| T        | L   | P   | S   | S   | T   | E        | T   | D   | Y   | K   | N   | N   | G   | T   | F   | R   | T   | I   | 475  |  |  |  |  |  |
| TGT      | AGC | ATT | CCA | GTT | AAG | AAA      | GAC | TAT | TGG | GCC | ATG | GGC | CAT | ACC | TAC | AAA | TGT | GAA | 1482 |  |  |  |  |  |
| C        | S   | I   | P   | V   | K   | K        | D   | Y   | W   | A   | M   | G   | H   | T   | Y   | K   | C   | E   | 494  |  |  |  |  |  |
| CH6 exon |     |     |     |     |     | CH1 exon |     |     |     |     |     |     |     |     |     |     |     |     |      |  |  |  |  |  |
| GTC      | ACA | CAT | AAA | TCT | ATA | GTG      | AAA | AAG | ATA | GTG | AAG | AAC | ATT | AAT | GCA | TTT | GGT | CTC | 1539 |  |  |  |  |  |
| V        | T   | H   | K   | S   | I   | V        | K   | K   | I   | V   | K   | N   | I   | N   | A   | F   | G   | L   | 513  |  |  |  |  |  |
| TTT      | GCT | AGT | AAG | ACT | TCA | CAT      | GTT | TCT | TGT | GTG | ACC | AAT | GCC | ATC | AAT | GCT | TCC | ATA | 1596 |  |  |  |  |  |
| F        | A   | S   | K   | T   | S   | H        | V   | S   | C   | V   | T   | N   | A   | I   | N   | A   | S   | I   | 532  |  |  |  |  |  |
| AAG      | TGG | ATT | TTA | GAT | GGG | AAG      | CCA | AGA | TTA | CAA | AAT | GAT | AGT | AAG | GAA | CAA | ATA | ATC | 1653 |  |  |  |  |  |
| K        | W   | I   | L   | D   | G   | K        | P   | R   | L   | Q   | N   | D   | S   | K   | E   | Q   | I   | I   | 551  |  |  |  |  |  |
| CAT      | AAT | AAT | AGG | ACC | TGG | ATC      | AAA | AGC | ACC | ATT | AGC | ATT | GGC | TTT | AAA | GAA | TGG | AAT | 1710 |  |  |  |  |  |
| H        | N   | N   | R   | T   | W   | I        | K   | S   | T   | I   | S   | I   | G   | F   | K   | E   | W   | N   | 570  |  |  |  |  |  |
| GCA      | GCT | TCC | AAT | TTT | AGC | TGT      | ATG | TTG | GAT | GTT | CCA | AAG | GAA | CTG | CCA | CAA | AGC | CAG | 1767 |  |  |  |  |  |
| A        | A   | S   | N   | F   | S   | C        | M   | L   | D   | V   | P   | K   | E   | L   | P   | Q   | S   | Q   | 589  |  |  |  |  |  |
| CH7 exon |     |     |     |     |     | CH1 exon |     |     |     |     |     |     |     |     |     |     |     |     |      |  |  |  |  |  |
| TTG      | AAG | ACA | TAC | AAG | ACC | CAA      | AGA | GAA | CCC | TCT | GTT | CTT | GTA | CTT | CAA | TCT | CCT | GAT | 1824 |  |  |  |  |  |
| L        | K   | T   | Y   | K   | T   | Q        | R   | E   | P   | S   | V   | L   | V   | L   | Q   | S   | P   | D   | 608  |  |  |  |  |  |
| TCT      | GAG | GAA | AGG | AAA | ACA | CTT      | GTC | TGT | ATT | GCG | GAT | GGA | CAC | TTT | CCC | AAA | GAA | ATA | 1881 |  |  |  |  |  |
| S        | E   | E   | R   | K   | T   | L        | V   | C   | I   | A   | D   | G   | H   | F   | P   | K   | E   | I   | 627  |  |  |  |  |  |
| AAG      | GTT | GAA | TGG | AAA | GTT | CAT      | AAT | GAA | AGT | CTA | GAT | TCT | TCT | TAT | AAT | GAA | ACA | GAG | 1938 |  |  |  |  |  |
