# Supplementary material
Source: PubMed Central journal article supplement (PMC1567701)
Supplement: pnas_0600291103_7.pdf [file pnas_0600291103_7.pdf]

|     |     |     |     |     |     |     |     |     |     |     |     |     |     |     |     |     |     |     |
|-----|-----|-----|-----|-----|-----|-----|-----|-----|-----|-----|-----|-----|-----|-----|-----|-----|-----|-----|
| TCA | GGA | GAC | AAC | ACA | TAC | GCC | ATG | TTC | AGT | ATG | ATC | ACC | ATC | TCC | AAA | GAC | AAA | TGG |
| S   | G   | D   | N   | T   | Y   | A   | M   | F   | S   | M   | I   | T   | I   | S   | K   | D   | K   | W   |
| AAA | AAG | AAA | ACC | TGG | TAT | ACC | TGC | AAT | GTG | CGT | CAC | ATG | ACA | AAT | GGC | AAT | GAA | ACC |
| K   | K   | K   | T   | W   | Y   | T   | C   | N   | V   | R   | H   | M   | T   | N   | G   | N   | E   | T   |
|     |     |     |     |     |     | CH2 | ▼   | M1  |     |     |     |     |     |     |     |     |     | M2  |
| CTG | ATC | AAA | GAA | ATA | TCT | GTT | GAA | GAC | CTC | GGG | GCA | TGG | ATT | ACT | GGC | CCA | GAA | GAC |
| L   | I   | K   | E   | I   | S   | V   | E   | D   | L   | G   | A   | W   | I   | T   | G   | P   | E   | D   |
|     |     |     |     |     |     |     |     |     |     |     |     |     |     |     |     |     |     |     |
|     |     |     |     |     |     |     |     | M3  | ▼   |     |     |     |     |     |     |     |     |     |
| CTC | AGG | GCA | TGG | ATT | ACT | GGC | CCA | GAT | TTG | TTT | GTA | GAT | GAG | AAC | TAC | ATC | TGT | GAA |
| L   | R   | A   | W   | I   | T   | G   | P   | D   | L   | F   | V   | D   | E   | N   | Y   | I   | C   | E   |
| GAA | GAG | GAC | AAT | TTT | CTC | TGG | ACC | ATA | GGA | TTC | AGC | TTC | ATC | ACT | TTG | TTC | CTC | ATT |
| E   | E   | D   | N   | F   | L   | W   | T   | I   | G   | F   | S   | F   | I   | T   | L   | F   | L   | I   |
|     |     |     |     |     |     |     |     |     |     |     |     |     |     |     |     |     |     |     |
|     |     |     |     |     |     |     |     |     |     |     |     | M4  | ▼   |     |     |     |     |     |
| AGC | ACA | TCC | TAT | GGC | GCT | GTA | ATC | ACA | TTC | ATT | AAG | ACA | AAG | TGG | CTT | ATT | TCA | AGA |
| S   | T   | S   | Y   | G   | A   | V   | I   | T   | F   | I   | K   | T   | K   | W   | L   | I   | S   | R   |
| ATT | CTA | CAC | CTG | GAA | ACG | CAT | GTC | CTT | CGG | AGG | TAA | CCA | GCT | GCT | GAA | GGC | TAT | ACT |
| I   | L   | H   | L   | E   | T   | H   | V   | L   | R   | R   | *   |     |     |     |     |     |     |     |
| AAA | CTG | TGA | AAC | CCA | TCT | ATT | GAC | ATA | TAT | CGA | TTT | ATC | TAT | ATT | TTT | CTG | TAC | CCT |
| TAA | ATA | AAA | GTT | TGA | TTA | TGA | AAA | AAA | AAA | AAA | AAA | AA  |     |     |     |     |     |     |
