# Supplementary material
Source: PubMed Central journal article supplement (PMC1567701)
Supplement: pnas_0600291103_9.pdf [file pnas_0600291103_9.pdf]

**a.**

|      | Nonamer          |              | Heptamer       |                                                       | Heptamer       |               | Nonamer          |
|------|------------------|--------------|----------------|-------------------------------------------------------|----------------|---------------|------------------|
| DH1. | <b>GCTTTTTGC</b> | atgaactttaat | <b>CAGAGTG</b> | cttacgggggtagcag<br>L T G V A<br>L R G * Q<br>Y G G S | <b>CACTGTG</b> | attcagtttcat  | <b>ACAAAAACA</b> |
| DH2. | <b>GCTTTTTGC</b> | atgagctttaat | <b>CAGAGTG</b> | cttactggggtagcgg<br>L T G V A<br>L L G * R<br>Y W G S | <b>CACTGTG</b> | attcagcttcat  | <b>TCAAAAACA</b> |
| DH3. | <b>AGTTAATGT</b> | actgctctgtgt | <b>CACTGTG</b> | tagactggggg<br>* T G<br>R L G<br>D W G                | <b>CACAATG</b> | cgatgatcctcat | <b>ACAAAAACT</b> |
| DH4. | <b>AGTTAATGT</b> | acttctctctgt | <b>CACTGTG</b> | cgagctgggg<br>R A G<br>E L G<br>S W                   | <b>CACAATG</b> | cacaatcttagt  | <b>ACAAAAACT</b> |
| DH5. | <b>TGTTTTTGT</b> | gagtctttgtat | <b>CAGTGTG</b> | gggaac<br>G N<br>G<br>E                               | <b>CACTGTG</b> | tttctctccaat  | <b>GCAAAAAAC</b> |

**b.**

|     | Nonamer          |                         | Heptamer       |                                                                                             |
|-----|------------------|-------------------------|----------------|---------------------------------------------------------------------------------------------|
| JH1 | <b>GATATGCT</b>  | taatggcaaatatcttaaagca  | <b>TGCTGTG</b> | ttaCTATGCTTACTTTGACGCTGGGGACAAGGGACCACAGTCACA<br>Y Y A Y F D A W G Q G T T V T              |
| JH2 | <b>TGTTTTTGT</b> | cagtctaaattggaactttatt  | <b>TACTGTG</b> | atTACTTCGTTACTGGGGACAAGGAACTATGGTCACCGTCACTTCAG<br>Y F A Y W G Q G T M V T V T S            |
| JH3 | <b>GTATTTGAC</b> | aggctttagtacagttctgaga  | <b>CACTGTG</b> | acTACTTTGACTACTGGGGACCAGGGACCATGGTCACCGTCACTTCAG<br>Y F D Y W G P G T M V T V T S           |
| JH4 | <b>TTATTTGTA</b> | ctgagaccaccgcgacaaagtac | <b>CTCAGTG</b> | ctACTGGTATTTTCGAGCACTGGGGTTCAGGCACCATGGTCACCGTCACCTCAG<br>Y W Y F E H W G S G T M V T V T S |
| JH5 | <b>TTGGTTATG</b> | tcttttttgtgtaagaatcaga  | <b>AACTGTG</b> | tgtCTATGACTGGGGACAAGGAACCCCTGGTTACTGTAAACATCAG<br>Y D W G Q G T L V T V T S                 |
| JH6 | <b>ATTTATTGT</b> | atgtcttctgaggataaattaca | <b>TAATGTG</b> | tACTATGCTTTTCGATTACTGGGGCCCTGGAACAATGGTCACCGTCACATCAG<br>Y Y A F D Y W G P G T M V T V T S  |
| JH7 | <b>GATTTGTAA</b> | ctgaacttaatgtagagatattt | <b>CAATGTG</b> | acgACTGGTTCGCTTACTGGGGTCAAGGTACCATGGTGA.....<br>D W F A Y W G Q G T M V                     |
