# Supplementary material
Source: PubMed Central journal article supplement (PMC1567701)
Supplement: pnas_0600291103_12.pdf [file pnas_0600291103_12.pdf]

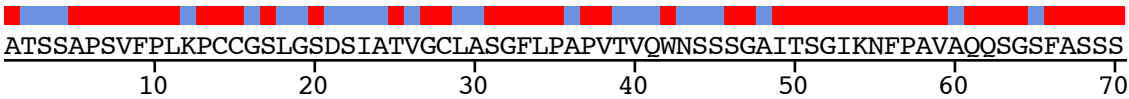

trop IgY ATQHAPSVFPLRPPCCGSLGSDSHVTVGCLSSGFLPAPVTVKWN--SGAITSGIKNFPVAVLQQSGSFASSS 68  
 trop IgF AQSSAPSVFPLKPCCSS--SNEIATIGCFASGFLPQPVNIQWKSSSGSITSGIKNFPVAVAQQSGYFASSS 68

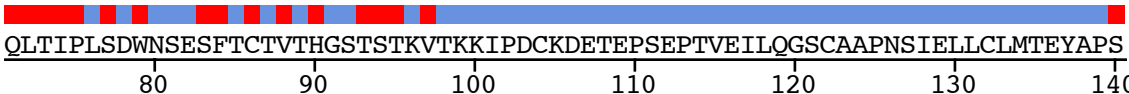

trop IgY QLTIPLSDWKDKSFECNVEHAPTSTKVNKKIPDCKDETEPSEPTVEILQGS CAAPNSIELLCMLTEYAPS 138  
 trop IgF QLTIPISRWNSESFCTCTVTHGSTSTPVT-----S 97

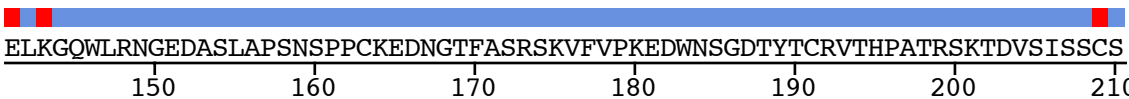

trop IgY EIKVQWLRNGEDASLAPSNSPPCKEDNGTFASRSKVFVFKEDWNSGDYTYTCRVTHPATRSKTDVSISSCS 208  
 trop IgF ELKG-----TSCN 105

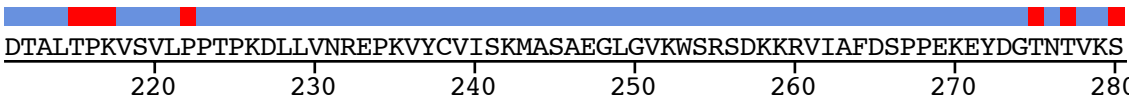

trop IgY DTALTPKVEVLPPTPKDLLVNREPKVYCVISKMASAEGLTVKWSRSDKKRVIAFDSPPEKEYDGTFTVKS 278  
 trop IgF R---TPKTSIMP-----G-----NNTNTKPS 123

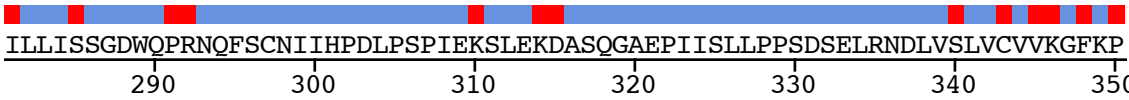

trop IgY ILKISSGDWQPRNQFSCNIIHPDLPSPIEKS IQKDQDQGAEP IISLLPPSDDEL RNDLFVSLVCVVKDFKP 348  
 trop IgF IFLYS---PR-----T---KELEK DAS-----S-----LISIICLVKGFYP 153

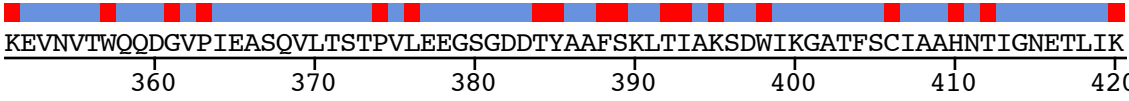

trop IgY KEIYIFWKKDGVPIEKEYYITTT PVL EEE--EDTYLAF SKLTI AKSDWIRGATFSCIAAHNTISQORDIKK 416  
 trop IgF KNVNVTWQONGSPMNASQV LNSE PQLNNGSGDNTYAMF SMITISKDKWKKKTWYTCNVRHMTNGNETLIK 223

EISVGNC-

trop IgY NR--GK 420  
 trop IgF EISVGNC. 231
