# Supplementary material
Source: PubMed Central journal article supplement (PMC1567701)

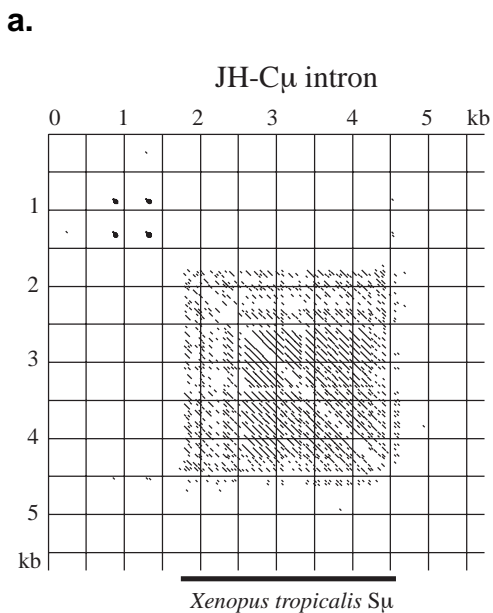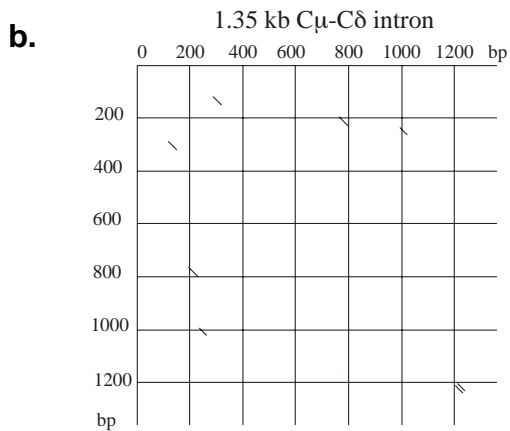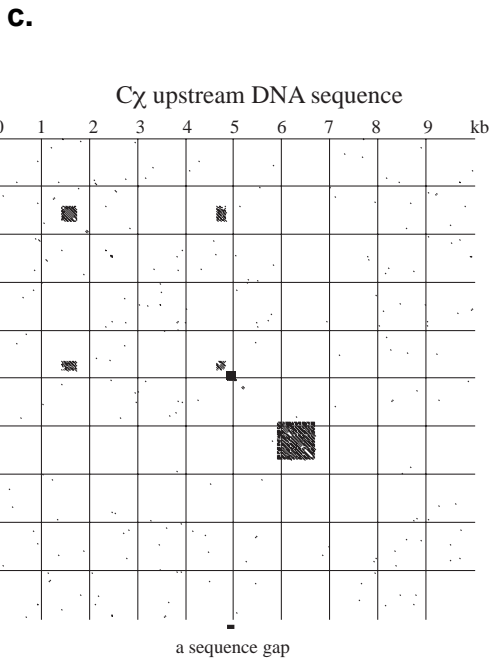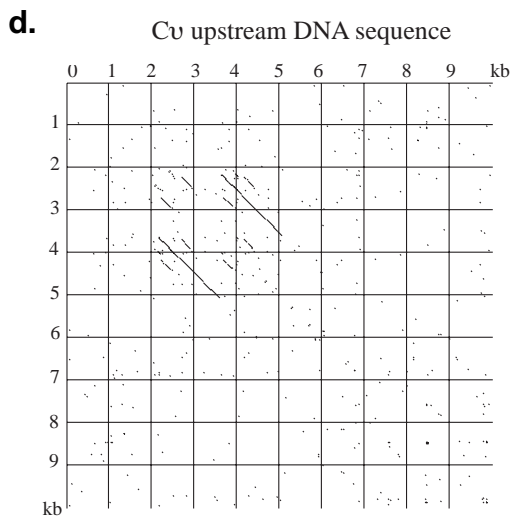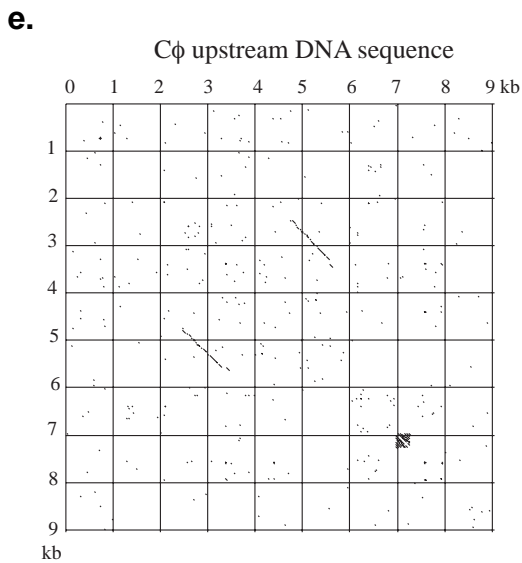

Supplement: pnas_0600291103_10.pdf [file pnas_0600291103_10.pdf]

**a.**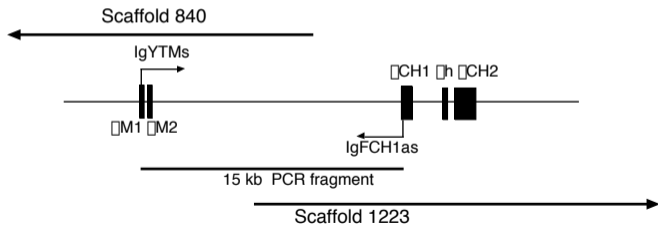**b.**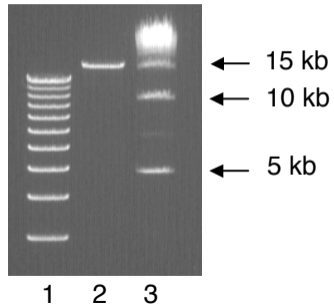

Supplement: pnas_0600291103_8.pdf [file pnas_0600291103_8.pdf]
